# Supplementary material for: Self-healable PEDOT-based all-organic films with excellent electrochromic performances
Source: Royal Society of Chemistry journal article supplement (doi:10.1039/d2nj03966d), 2022-01-01
Supplement: d2nj03966d1.pdf [file d2nj03966d1.pdf]

## Supporting Information

### **Thermo-driven self-healable PEDOTs-based all-organic films with excellent electrochromic performances**

Xiaowen Xie<sup>1</sup>, Jiarui Yu<sup>1</sup>, Zhanqi Li<sup>2</sup>, Zhixin Wu<sup>1</sup>, Shuai Chen<sup>1,2\*</sup>

<sup>1</sup> Jiangxi Key Laboratory of Flexible Electronics, School of Pharmacy,  
Jiangxi Science & Technology Normal University, Nanchang 330013,  
Jiangxi, China.

<sup>2</sup> Jiangxi Engineering Laboratory of Waterborne Coatings, Nanchang  
330013, Jiangxi, China.

\*: Corresponding author. Fax/Tel: +86-791-83832345; Email:  
shuaichen@jxstnu.edu.cn

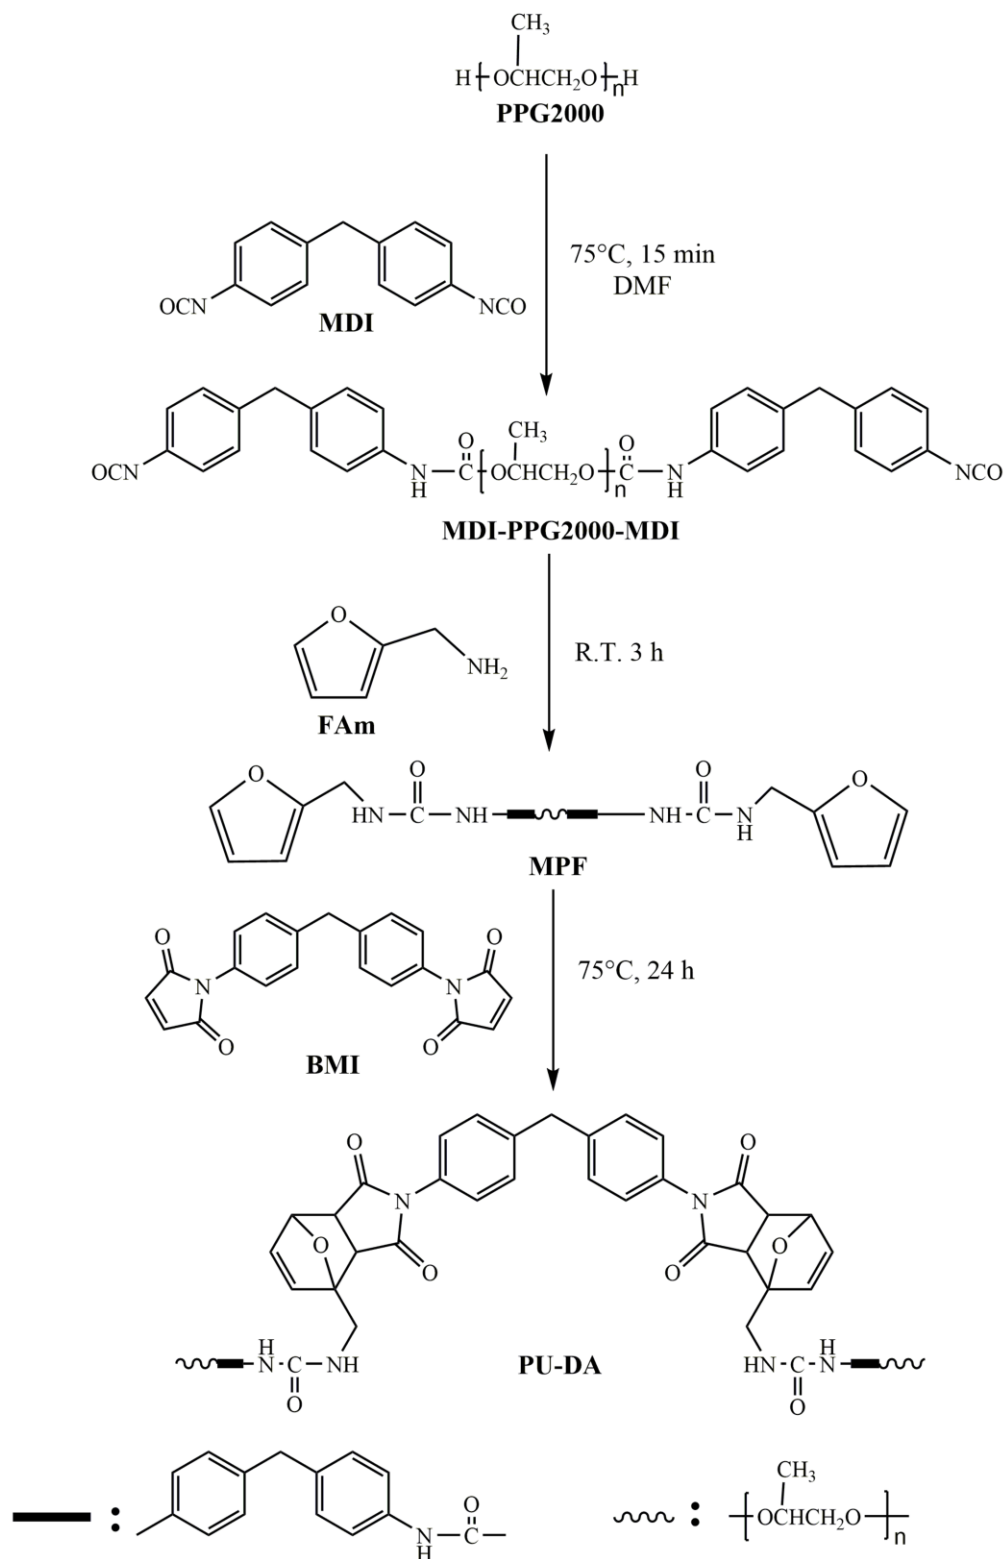

**Scheme S1.** Synthetic route of PU-DA <sup>[1]</sup>.

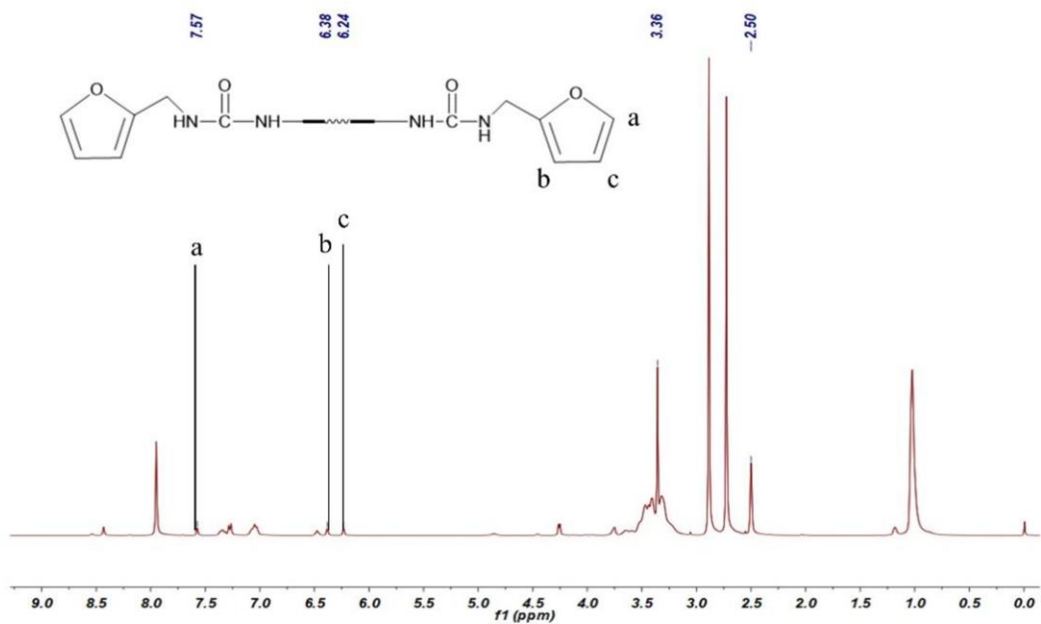

**Figure S1.**  $^1\text{H}$  NMR spectrum of MPF (400 MHz,  $\text{DMSO-d}_6$ ).

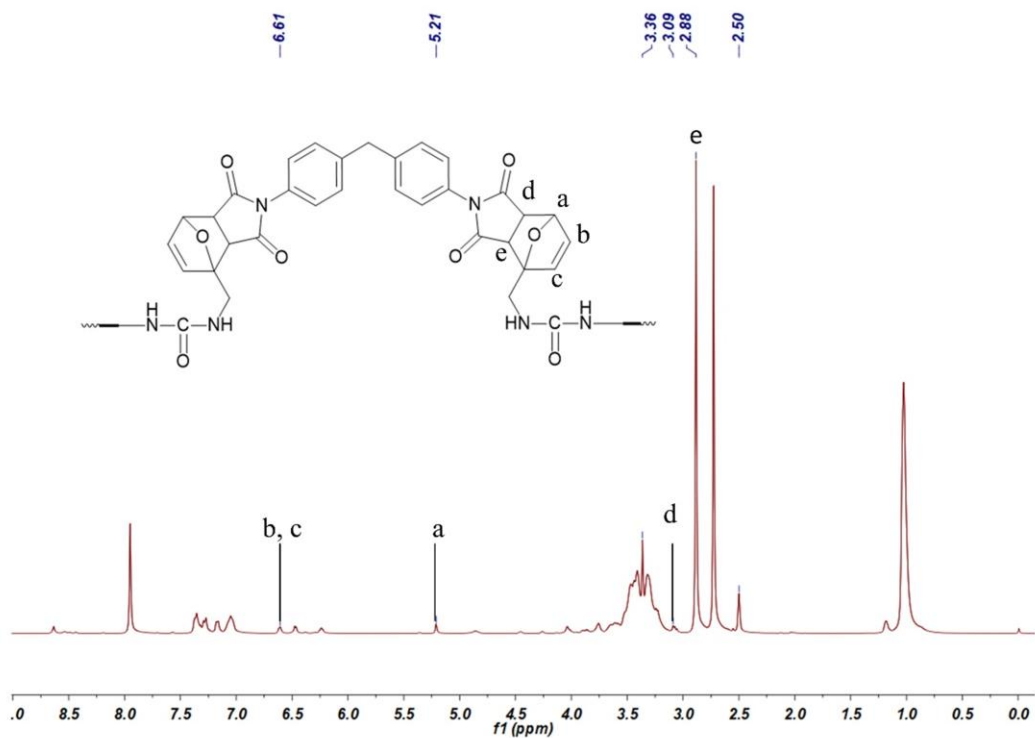

**Figure S2.**  $^1\text{H}$  NMR spectrum of PU-DA (400 MHz,  $\text{DMSO-d}_6$ ).

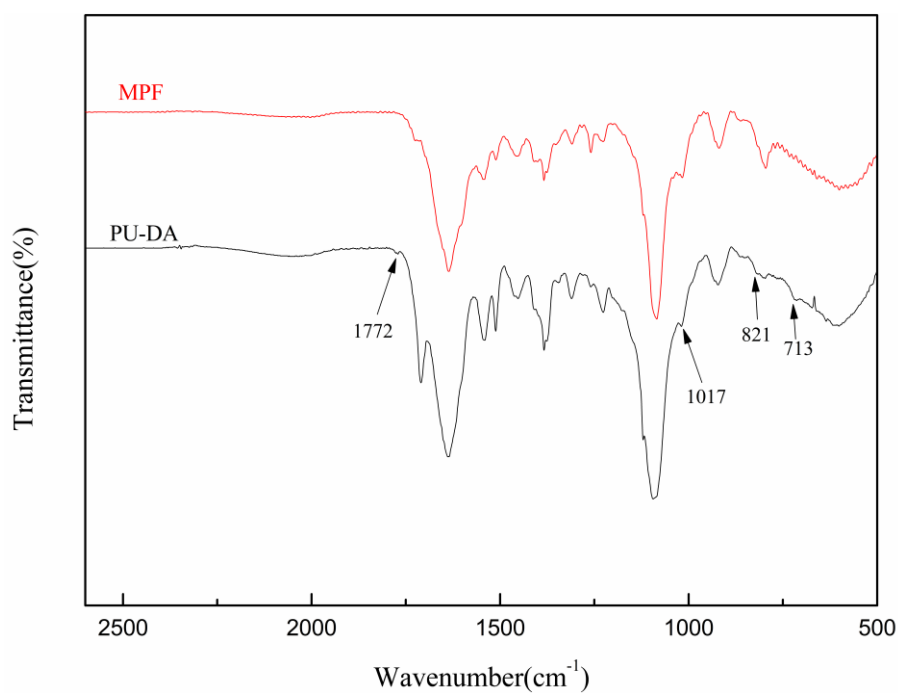

**Figure S3.** FT-IR spectra of MPF and PU-DA.

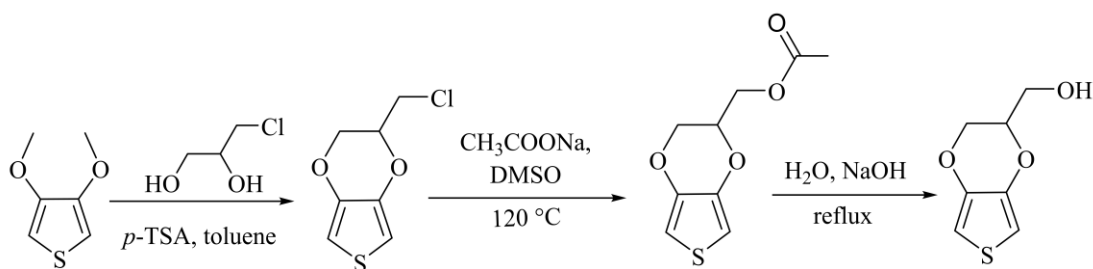

**Scheme S2.** Synthetic route of EDTM.

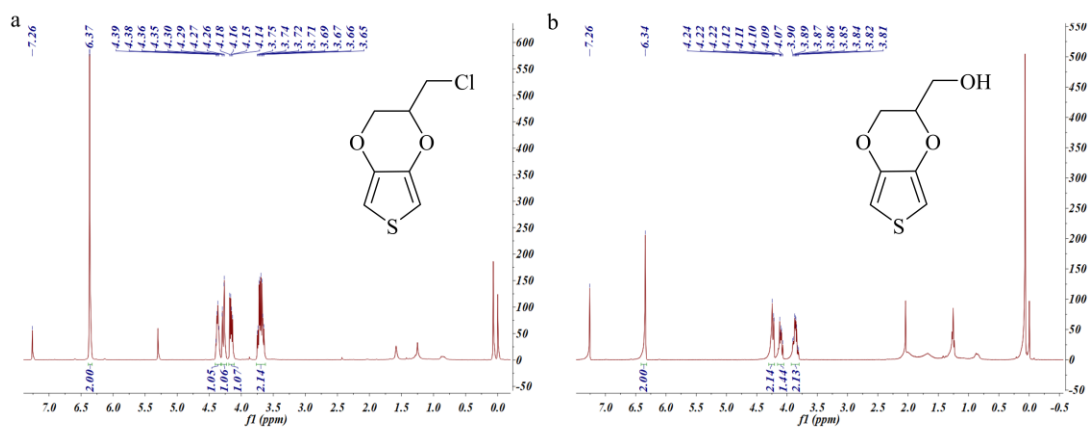

**Figure S4.**  $^1\text{H}$  NMR (400 MHz,  $\text{CDCl}_3$ ) spectra of (a) EDOT-MeCl and (b) EDTM.

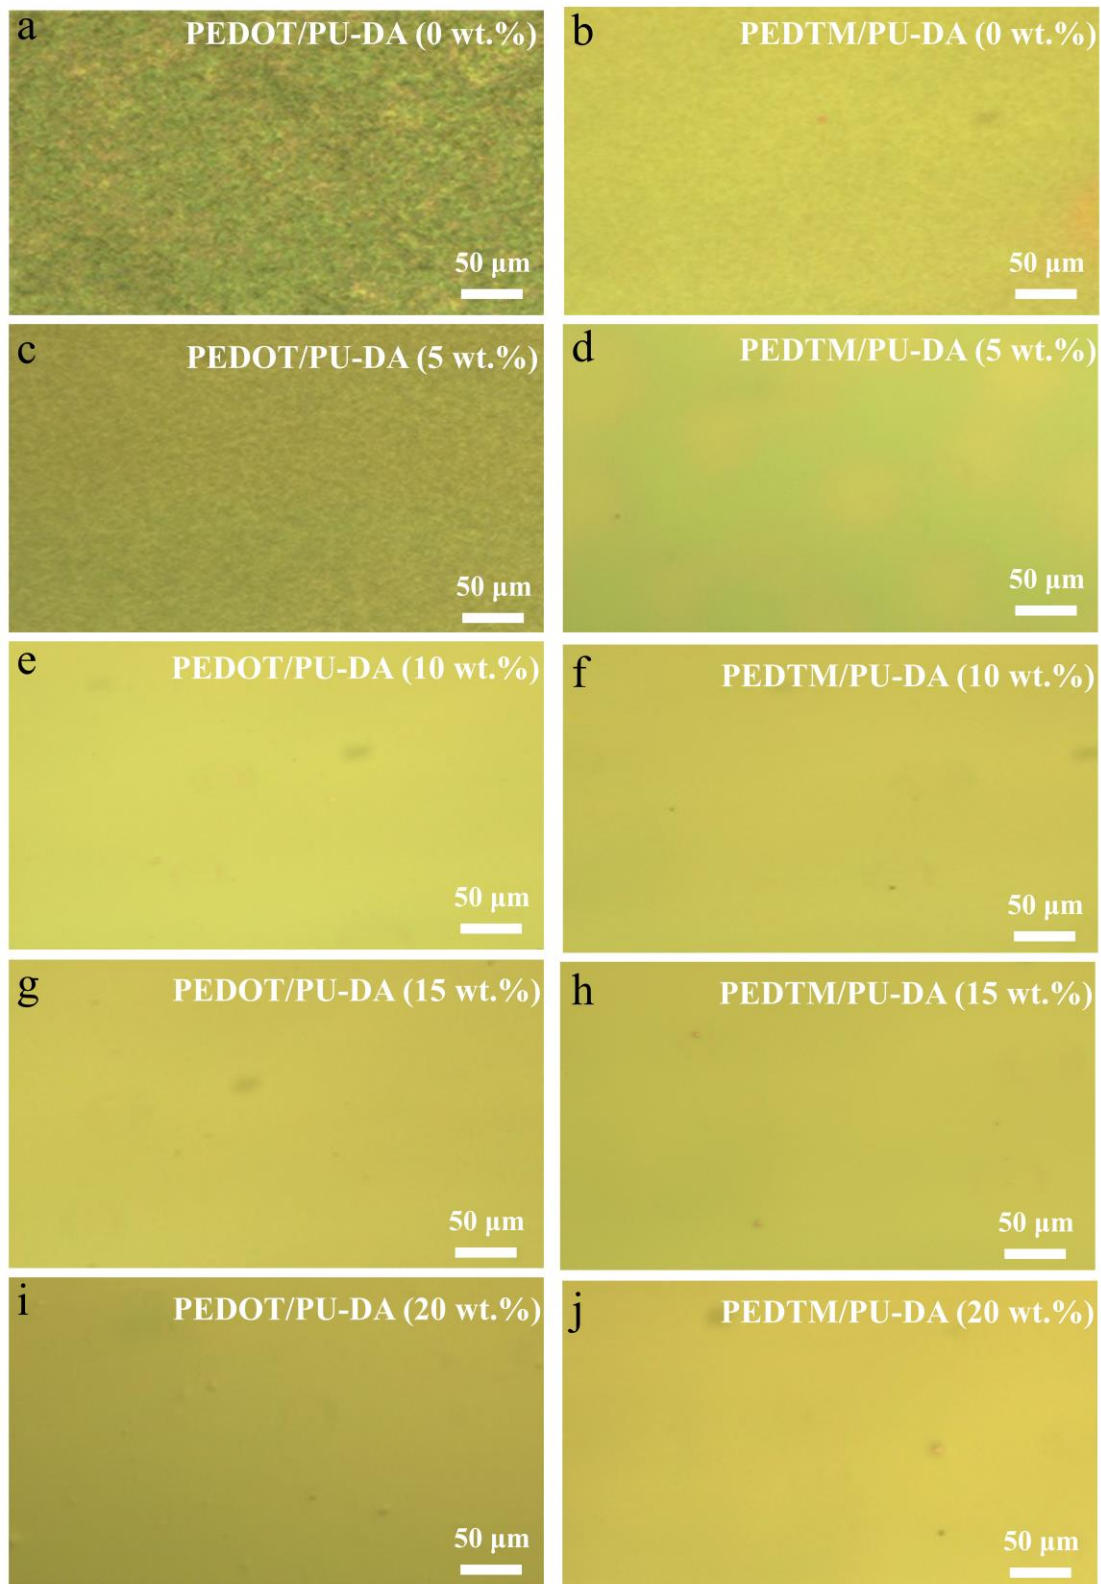

**Figure S5.** Microscope morphology photos of PEDOT/PU-DA (a, c, e, g, i) and PEDTM/PU-DA (b, d, f, h, j) films at varied PU-DA contents (0 wt.%, 5 wt.%, 10 wt.%, 15 wt.%, 20 wt.%).

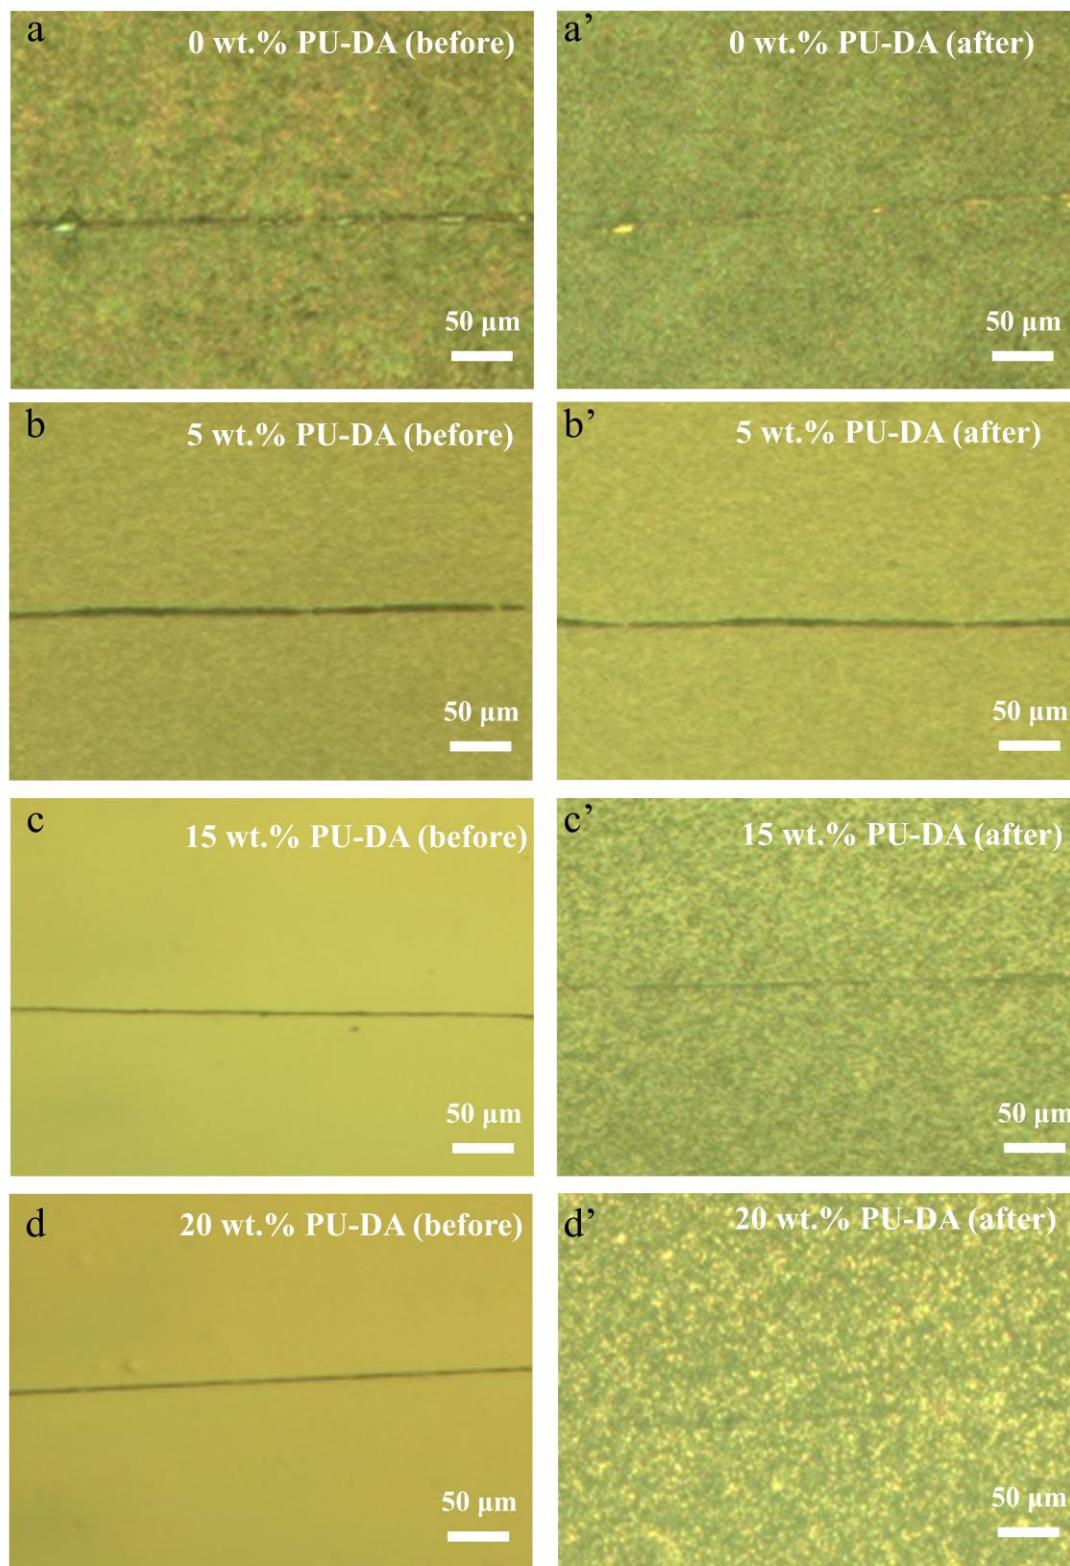

**Figure S6.** Microscope morphology photos of PEDOT/PU-DA films at varied PU-DA contents (0 wt.%, 5 wt.%, 15 wt.%, 20 wt.%) before (a, b, c, d) and after (a', b', c', d') self-healing.



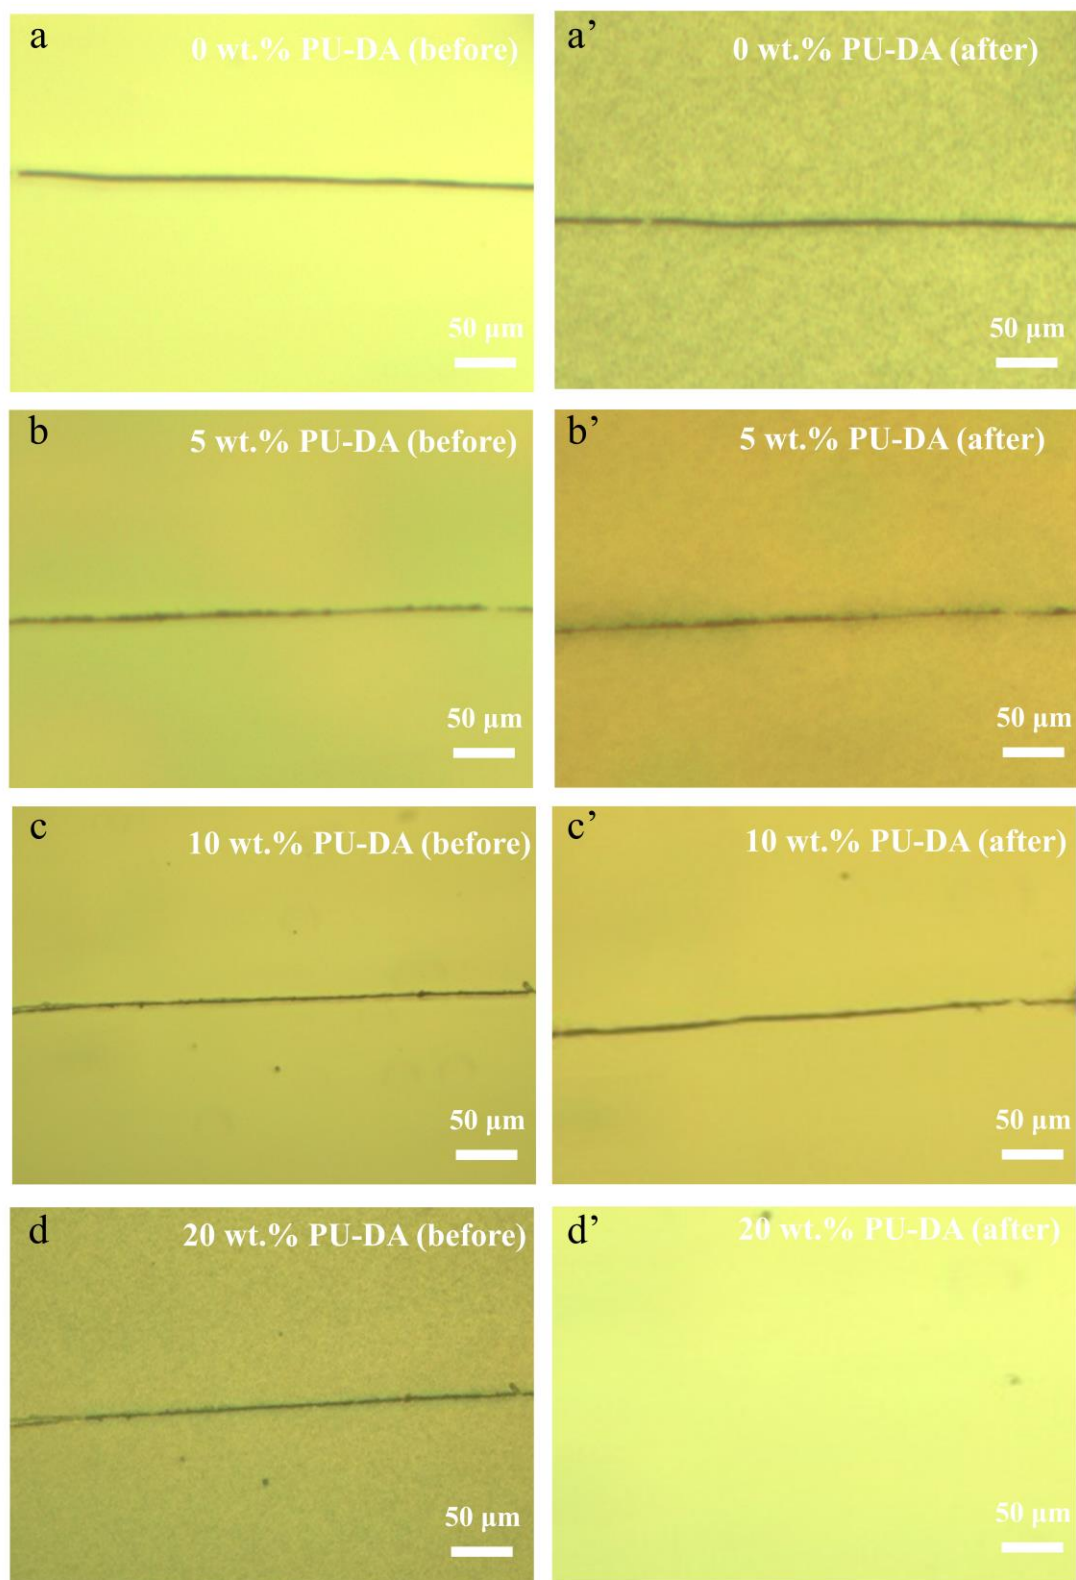

**Figure S7.** Microscope morphology photos of PEDTM/PU-DA films at varied PU-DA contents (0 wt.%, 5 wt.%, 10 wt.%, 20 wt.%) before (a, b, c, d) and after (a', b', c', d') self-healing.

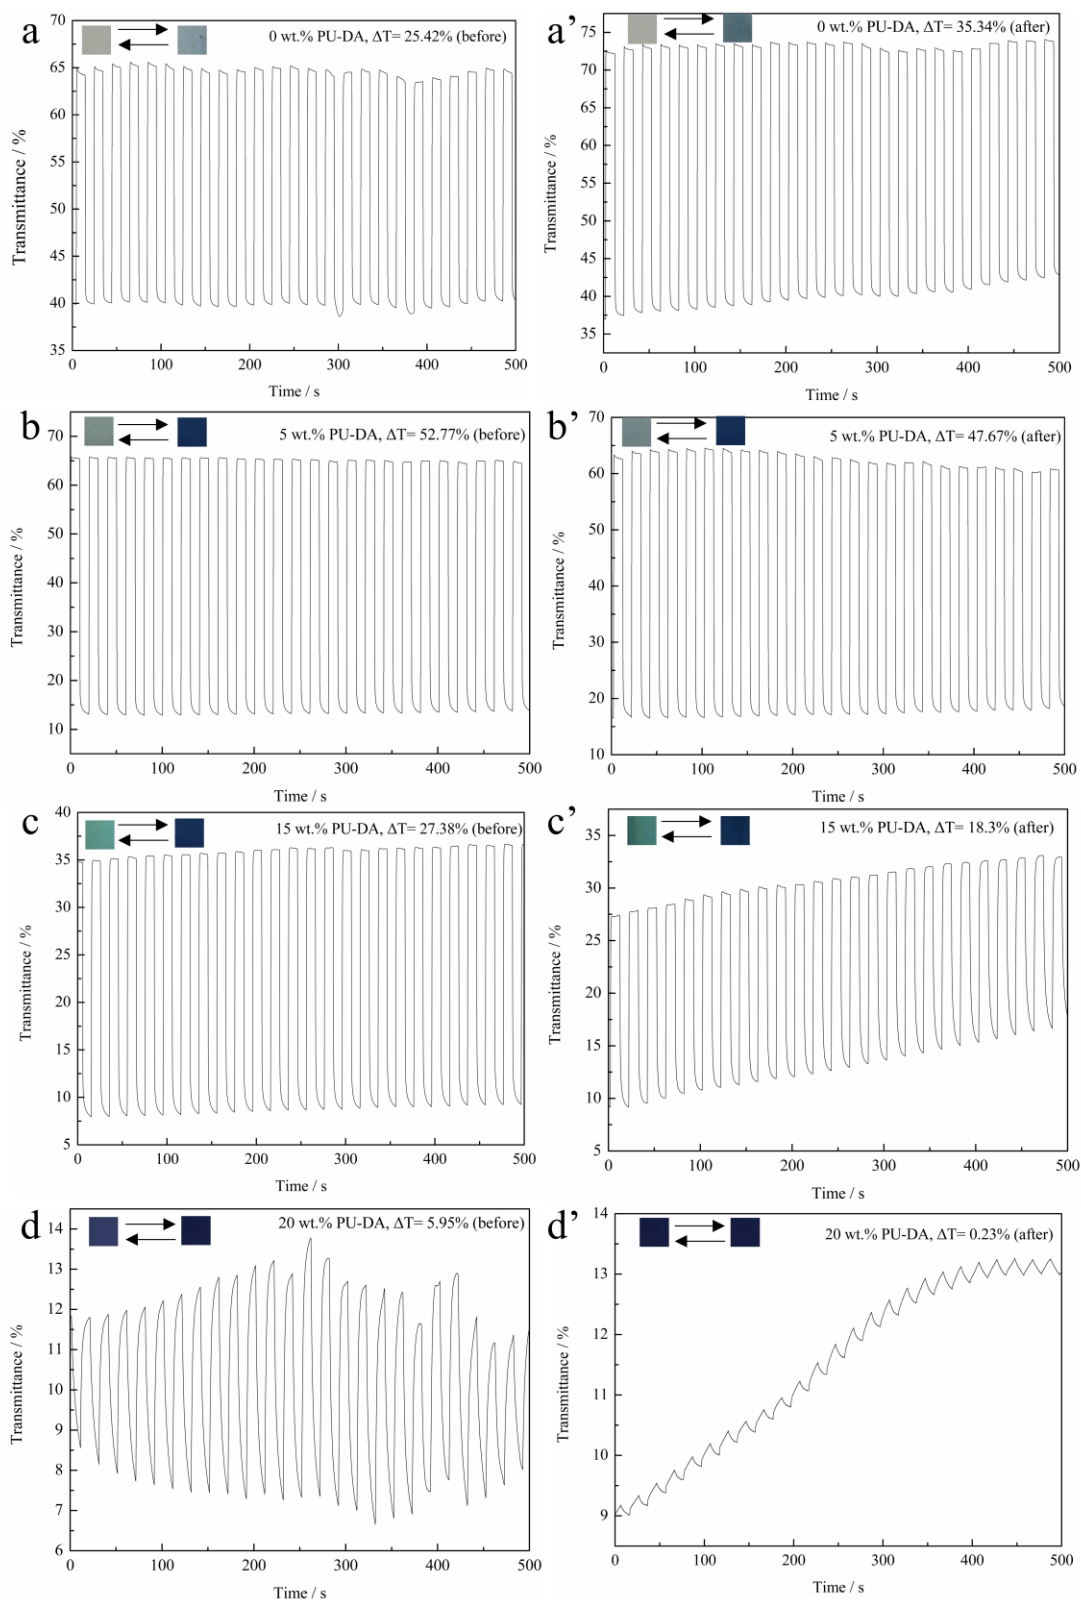

**Figure S8.** Variation curves of transmittance change at 600 nm and color change photos (inset) of PEDOT/PU-DA films at varied PU-DA contents (0 wt.%, 5 wt.%, 15 wt.%, 20 wt.%) before (a, b, c, d) and after (a', b', c', d') self-healing.



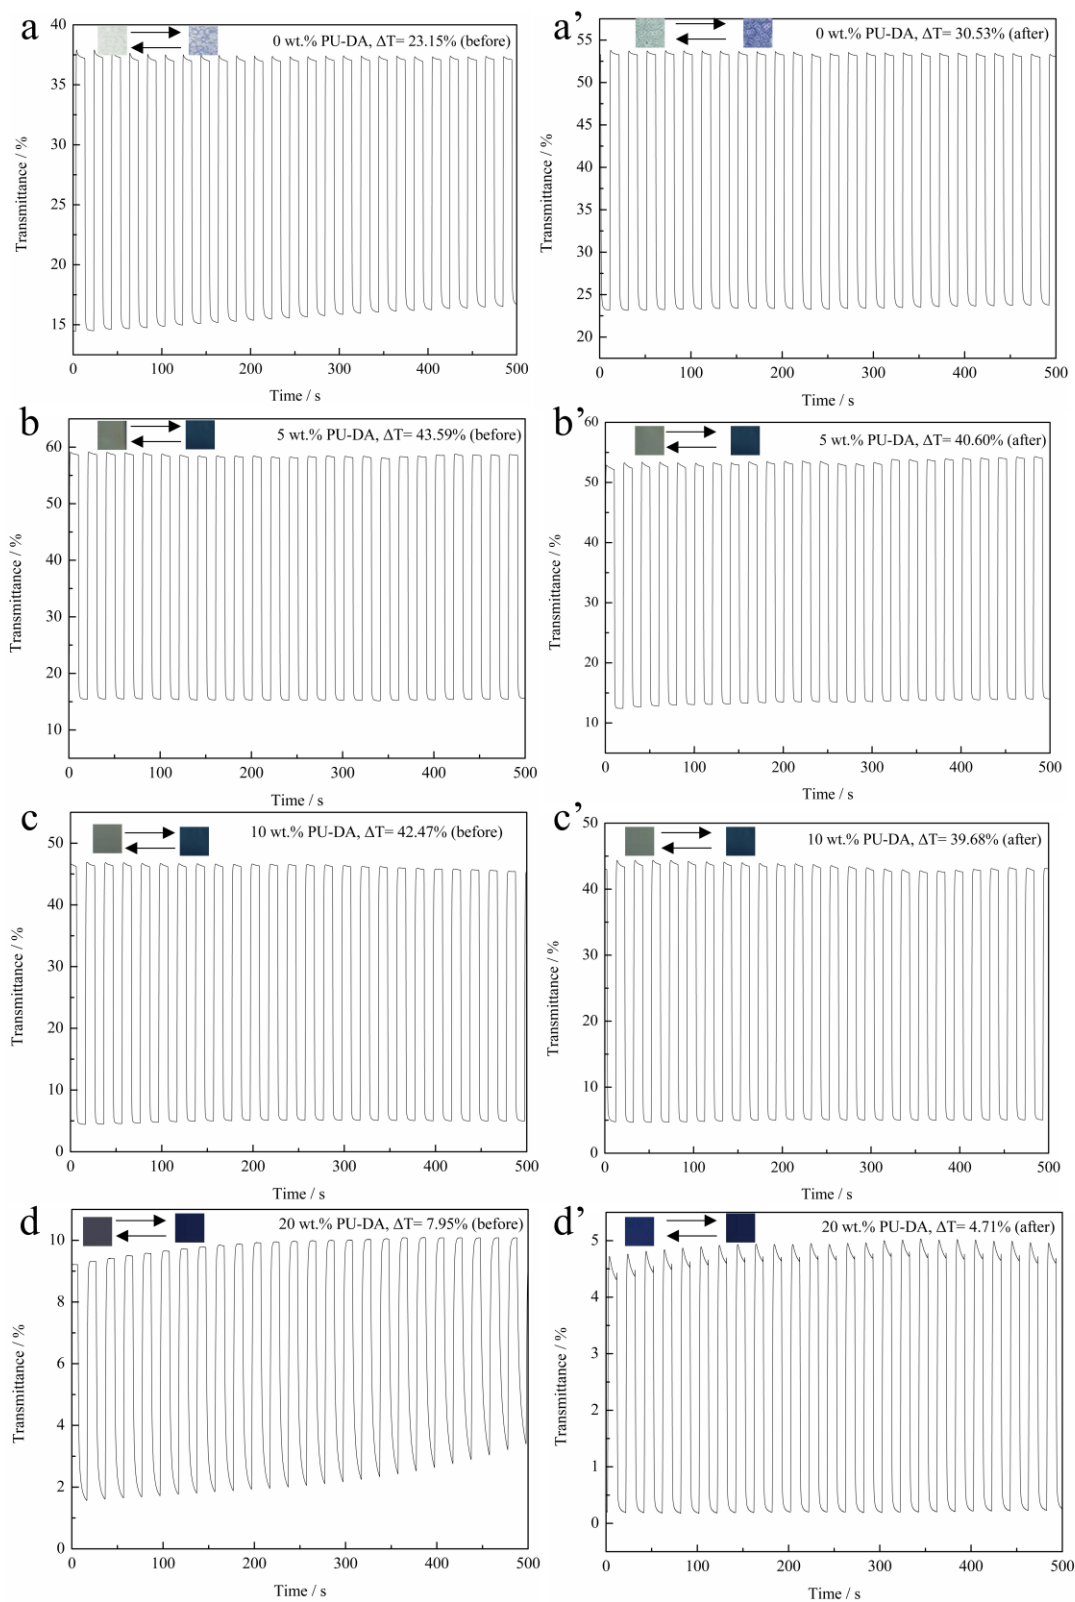

**Figure S9.** Variation curves of transmittance change at 610 nm and color change photos (inset) of PEDTM/PU-DA films at varied PU-DA contents (0 wt.%, 5 wt.%, 10 wt.%, 20 wt.%) before (a, b, c, d) and after (a', b', c', d') self-healing.

Reference:

- [1] J. R. Yu, N. Gao, X. W. Xie, X. Xin, Z. Q. Li, S. Chen, J. K. Xu, *Journal of Polymer Science*, 2021, **60**, 794-802.
